# Supplementary material for: An Overview of SARS-CoV-2 Etiopathogenesis and Recent Developments in COVID-19 Vaccines
Source: MDPI journal article supplement (doi:10.3390/biom13111565), 2023-10-24
Supplement: s1 [file s1]

**Supplementary Table S1. List of antiviral drugs recommended for emergency use against COVID-19**

| Antiviral drug                                               | Dose                                                        | Route       | Manufacturer                 | Indications for use                                                                                                                                                                                                                  | Trials/Studies involved                                    | Side effects                         |
|--------------------------------------------------------------|-------------------------------------------------------------|-------------|------------------------------|--------------------------------------------------------------------------------------------------------------------------------------------------------------------------------------------------------------------------------------|------------------------------------------------------------|--------------------------------------|
| PAXLOVID<br>(Nirmatrelvir and Ritonavir tablets co-packaged) | Nirmatrelvir - 300mg or 150mg Ritonavir-150mg as prescribed | Oral        | Pfizer labs, USA             | EUA for the treatment of mild-to-moderate COVID-19 in adults and children 12 years of age and older weighing at least 88 pounds (40 kg) who are at high risk for progression to severe COVID-19, including hospitalization or death. | EPIC-HR trial                                              | Altered sense of taste and Diarrhoea |
| LAGEVRIO<br>(Molnupiravir capsules)                          | 800 mg                                                      | Oral        | Merck Sharp & Dohme LLC, USA | EUA for the treatment of adults at high risk for progression to severe COVID-19, including hospitalization or death or whom alternative COVID-19 treatment options approved or authorized by FDA                                     | MOVE-OUT trial                                             | Diarrhoea, nausea and dizziness      |
| VEKLURY<br>Remdesivir                                        | 200mg first dose and 100mg subsequent doses                 | IV infusion | Gilead Sciences, Inc., USA   | EUA for the treatment of adults and children at high risk and hospitalized with severe disease                                                                                                                                       | <del>ACTT-1</del> ; CATCO; DisCoVeRy; WHO Solidarity Trial | Increased liver transaminases        |

The table summarizes various antiviral drugs used alone or co-administered with another, their dosage, route of administration, manufacturer, indications for use, clinical trials and side effects [100,102]. IV-intravenous; EUA-Emergency Use Authorization.

**Supplementary Table S2. List of monoclonal antibodies recommended for emergency therapeutic use against COVID-19**

| Antibody                                               | Dose and Route                                                                           | Route                       | Manufacturer                         | Indications for use                                                                                                                                                                                                                                                          | Half-life (days) | Variants                            | Trial name /Studies involved                      | Adverse events                                                     |
|--------------------------------------------------------|------------------------------------------------------------------------------------------|-----------------------------|--------------------------------------|------------------------------------------------------------------------------------------------------------------------------------------------------------------------------------------------------------------------------------------------------------------------------|------------------|-------------------------------------|---------------------------------------------------|--------------------------------------------------------------------|
| Bebtelovimab                                           | 175 mg                                                                                   | IV injection                | Eli Lilly and Company, USA           | EUA for high-risk mild-to-moderate COVID-19 in adults and pediatric patients (12 years of age and older weighing at least 40 kg):                                                                                                                                            | 11.5             | All VOC and VOI                     | Blaze-4 trial                                     | None except infusion-related reactions, pruritus and rash          |
| Bamlanivimab and Etesevimab coadministration           | 700 mg and 1400 mg respectively                                                          | IV infusion                 | Eli Lilly and Company, USA           | EUA for high-risk mild-to-moderate COVID-19 in adults and pediatric patients (12 years including neonates)                                                                                                                                                                   | 20.9 and 32.6    | All VOC and VOI                     | Blaze 1 and 2 trials                              | Nausea, dizziness, pruritus, anaphylaxis                           |
| ACTEMRA (tocilizumab)                                  | 8mg/kg or 12 mg/kg body weight for patients at >30kg and ≤30 kg body weight respectively | IV infusion                 | Genentech, Inc, USA                  | EUA for COVID-19 in hospitalized pediatric patients (2 years of age and older) receiving systemic corticosteroids and requiring supplemental oxygen, non-invasive or invasive mechanical ventilation, or extracorporeal membrane oxygenation (AVOID use of any live vaccine) | 13               | All VOC and VOI                     | Recovery trial EMPACTA, COVACTA, REMDACTA studies | Constipation, anxiety, diarrhea, insomnia, hypertension and nausea |
| EVUSHELD (tixagevimab and cilgavimab coadministration) | 300 mg each                                                                              | IM injection                | Astrazeneca, USA                     | EUA for COVID-19 pre-exposure prophylaxis of COVID-19 in adults and pediatric individuals (12 years of age and older weighing at least 40 kg):                                                                                                                               | 87.9 and 82.9    | All VOC and VOI                     | PROVENT and STORM CHASER trials                   | Headache, fatigue, and cough.                                      |
| REGEN-COV (casirivimab and imdevimab coadministration) | 600 mg each                                                                              | IV infusion or SC injection | Regeneron Pharmaceuticals, Inc., USA | EUA for high-risk COVID- in adults and pediatric patients (12 years of age and older weighing at least 40 kg)                                                                                                                                                                | 31.8 and 26.9    | Alpha, Beta, Gamma, Delta and Kappa | COV-2067, COV-2069 and COV-2093                   | Dizziness, nausea, rash, chills, and lymphadenopathy               |
| SOTROVIMAB                                             | 500 mg                                                                                   | IV infusion                 | Glaxo Smith Kline LLC, USA           | EUA for high-risk COVID- in adults and pediatric patients (12 years of age and older weighing at least 40 kg)                                                                                                                                                                | 49               | All VOC and VOI                     | COMET-ICE and COMET-TAIL trial                    | Rash, diarrhoea, infusion-related reactions, and hypersensitivity  |

The table summarizes various monoclonal antibodies administered alone or co-administered with another, their dosage, route of administration, manufacturer, indications for use, half-life, clinical trials and adverse events [103]. IV-intravenous; IM-intramuscular; SC-subcutaneous; mg-milligram; EUA-Emergency Use Authorization; VOC-Variants of Concern; VOI- Variants of Interest.

| Supplementary Table S3. Description of various COVID-19 vaccine types currently in clinical trials |                   |                                                         |                                               |                    |       |       |                         |
|----------------------------------------------------------------------------------------------------|-------------------|---------------------------------------------------------|-----------------------------------------------|--------------------|-------|-------|-------------------------|
| S.No                                                                                               | Vaccine type      | Developer                                               | Name                                          | Approved countries | Phase | Route | Dose                    |
| 1                                                                                                  | Protein subunit   | Anhui Zhifei Longcom                                    | Zifivax                                       | 4                  | 3     | IM    | Day 0 + 28 + 56         |
| 2                                                                                                  | Protein subunit   | Bagheiat-allah University of Medical Sciences           | Noora vaccine                                 | 1                  | 3     | IM    | Day 0 + 21 + 35         |
| 3                                                                                                  | Inactivated Virus | Bharat Biotech                                          | Covaxin                                       | 14                 | 3     | IM    | Day 0 + 14              |
| 4                                                                                                  | NRVV              | Bharat Biotech                                          | iNCOVACC                                      | 1                  | 3     | IN    | Day 0                   |
| 5                                                                                                  | Protein subunit   | Biological E Limited                                    | Corbevax                                      | 2                  | 3     | IM    | Day 0 + 28              |
| 6                                                                                                  | NRVV              | CanSino                                                 | Convidecia                                    | 10                 | 3     | IM    | Day 0 + 21              |
| 7                                                                                                  | NRVV              | CanSino                                                 | Convidecia Air                                | 2                  | 4     | IH    | Day 0                   |
| 8                                                                                                  | Protein subunit   | Center for Genetic Engineering and Biotechnology (CIGB) | Abdala                                        | 6                  | 3     | IM    | Day 0 +28 + 56          |
| 9                                                                                                  | Inactivated Virus | Chumakov Center                                         | KoviVac                                       | 3                  | 3     | IM    | Day 0 + 14              |
| 10                                                                                                 | NRVV              | Gamaleya                                                | Gam-COVID-Vac                                 | 1                  | 3     | IM    | Day 0 + 21              |
| 11                                                                                                 | NRVV              | Gamaleya                                                | Sputnik Light                                 | 26                 | 3     | IM    | Day 0                   |
| 12                                                                                                 | NRVV              | Gamaleya                                                | Sputnik V                                     | 74                 | 3     | IM    | Day 0 + 21              |
| 13                                                                                                 | RNA               | Gennova Biopharmaceuticals Limited                      | GEMCOVAC-19                                   | 1                  | 2/3   | IM    | Day 0 + 28              |
| 14                                                                                                 | Inactivated Virus | Health Institutes of Turkey                             | Turkovac                                      | 1                  | 3     | IM    | Day 0 + 21              |
| 15                                                                                                 | Protein subunit   | Instituto Finlay de Vacunas Cuba                        | Soberana 02                                   | 4                  | 3     | IM    | Day 0 + 28              |
| 16                                                                                                 | Protein subunit   | Instituto Finlay de Vacunas Cuba                        | Soberana Plus                                 | 2                  | 3     | IM    | Booster for Soberana 02 |
| 17                                                                                                 | NRVV              | Janssen (Johnson & Johnson)                             | Jcovden                                       | 113                | 4     | IM    | Day 0 or Day 0 +56      |
| 18                                                                                                 | Protein subunit   | Livzon Mabpharm Inc                                     | V-01                                          | 1                  | 3     | IM    | Day 0 + 21              |
| 19                                                                                                 | VLP               | Medicago                                                | Covifenz                                      | 1                  | 3     | IM    | Day 0 + 21              |
| 20                                                                                                 | Protein subunit   | Medigen                                                 | MVC-COV1901                                   | 4                  | 4     | IM    | Day 0 + 28              |
| 21                                                                                                 | RNA               | Moderna                                                 | Spikevax                                      | 88                 | 4     | IM    | Day 0 + 28              |
| 22                                                                                                 | RNA               | Moderna                                                 | Spikevax Bivalent Original/Omicron BA.1       | 38                 | 3     | IM    | Day 0 + 55              |
| 23                                                                                                 | RNA               | Moderna                                                 | Spikevax Bivalent Original/Omicron BA.4/BA.5  | 33                 | 3     | IM    | Day 0 + 55              |
| 24                                                                                                 | Protein subunit   | National Vaccine and Serum Institute                    | Recombinant SARS-CoV-2 Vaccine (CHO Cell)     | 1                  | 3     | IM    | Day 0                   |
| 25                                                                                                 | Protein subunit   | Novavax                                                 | Nuvaxovid                                     | 40                 | 3     | IM    | Day 0 + 21              |
| 26                                                                                                 | Inactivated Virus | Organization of Defensive Innovation and Research       | FAKHRVAC (MIVAC)                              | 1                  | 1     | IM    | Day 0 + 14              |
| 27                                                                                                 | NRVV              | Oxford/AstraZeneca                                      | Vaxzevria                                     | 149                | 3     | IM    | Day 0 + 56              |
| 28                                                                                                 | RNA               | Pfizer/BioNTech                                         | Comirnaty                                     | 149                | 4     | IM    | Day 0 + 21              |
| 29                                                                                                 | RNA               | Pfizer/BioNTech                                         | Comirnaty Bivalent Original/Omicron BA.1      | 35                 | 3     | IM    | Day 0 + 21              |
| 30                                                                                                 | RNA               | Pfizer/BioNTech                                         | Comirnaty Bivalent Original/Omicron BA.4/BA.5 | 33                 | 3     | IM    | Day 0 + 21              |

|                                                            |                   |                                                            |                                              |     |     |    |                          |
|------------------------------------------------------------|-------------------|------------------------------------------------------------|----------------------------------------------|-----|-----|----|--------------------------|
| 31                                                         | Protein subunit   | PT Bio Farma                                               | IndoVac                                      | 1   | 3   | IM | Day 0 + 28               |
| 32                                                         | Protein subunit   | Razi Vaccine and Serum Research Institute                  | Razi Cov Pars                                | 1   | 3   | IM | Day 0 + 21 +51           |
| 33                                                         | Inactivated Virus | Research Institute for Biological Safety Problems (RIBSP)  | QazVac                                       | 2   | 3   | IM | Day 0 + 21               |
| 34                                                         | Protein subunit   | Sanofi/GSK                                                 | VidPrevtn Beta                               | 30  | 3   | IM | Day 0 + 21               |
| 35                                                         | NRVV              | Serum Institute of India                                   | Covishield (Oxford/ AstraZeneca formulation) | 49  | 3   | IM | Day 0 + 84               |
| 36                                                         | Protein subunit   | Serum Institute of India                                   | COVOVAX (Novavax formulation)                | 6   | 3   | IM | Day 0 + 21               |
| 37                                                         | Inactivated Virus | Shenzhen Kangtai Biological Products Co                    | KCONVAC                                      | 2   | 3   | IM | Day 0 + 28               |
| 38                                                         | Inactivated Virus | Shifa Pharmed Industrial Co                                | COVIran Barekat                              | 1   | 2/3 | IM | Day 0 + 14               |
| 39                                                         | Inactivated Virus | Sinopharm (Beijing)                                        | Covilo                                       | 93  | 4   | IM | Day 0 + 21               |
| 40                                                         | Inactivated Virus | Sinopharm (Wuhan)                                          | Inactivated (Vero Cells)                     | 2   | 4   | IM | Day 0 + 21               |
| 41                                                         | Inactivated Virus | Sinovac                                                    | CoronaVac                                    | 56  | 4   | IM | Day 0 + 14               |
| 42                                                         | Protein subunit   | SK Bioscience Co Ltd                                       | SKYConvione                                  | 1   | 3   | IM | Day 0 + 28               |
| 43                                                         | Protein subunit   | Takeda                                                     | TAK-019 (Novavax formulation)                | 1   | 3   | IM | Day 0 + 14 + 28          |
| 44                                                         | RNA               | Takeda                                                     | TAK-919 (Moderna formulation)                | 1   | 3   | IM | Day 0 + 28               |
| 45                                                         | Inactivated Virus | Valneva                                                    | VLA2001                                      | 33  | 3   | IM | Day 0 + 21               |
| 46                                                         | Protein subunit   | Vaxine/CinnaGen Co.                                        | SpikoGen                                     | 1   | 3   | IM | Day 0 + 21               |
| 47                                                         | Protein subunit   | Vector State Research Center of Virology and Biotechnology | Aurora-CoV                                   | 1   | 3   | IM | Day 0 + 21               |
| 48                                                         | Protein subunit   | Vector State Research Center of Virology and Biotechnology | EpiVacCorona                                 | 4   | 3   | IM | Day 0 + 21               |
| 49                                                         | RNA               | Walvax                                                     | Awcora                                       | 1   | 3   | IM | Day 0 + 14 or Day 0 + 28 |
| 50                                                         | DNA               | Zydus Cadila                                               | ZyCoV-D                                      | 1   | 3   | ID | Day 0 + 28 + 56          |
| <b>Vaccines Granted Emergency Use Listing (EUL) by WHO</b> |                   |                                                            |                                              |     |     |    |                          |
| 1                                                          | Protein subunit   | Serum Institute of India                                   | COVOVAX (Novavax formulation)                | 6   | 3   | IM |                          |
| 2                                                          | Protein subunit   | Novavax                                                    | Nuvaxovid                                    | 40  | 3   | IM | Day 0 + 21               |
| 3                                                          | RNA               | Moderna                                                    | Spikevax                                     | 88  | 4   | IM | Day 0 + 28               |
| 4                                                          | RNA               | Pfizer/BioNTech                                            | Comirnaty                                    | 149 | 4   | IM | Day 0 + 21               |
| 5                                                          | NRVV              | CanSino                                                    | Convdecia                                    | 10  | 3   | IM | Day 0 + 21               |
| 6                                                          | NRVV              | Janssen (Johnson & Johnson)                                | Jcovden                                      | 113 | 4   | IM | Day 0 or Day 0 +56       |
| 7                                                          | NRVV              | Oxford/AstraZeneca                                         | Vaxzevria                                    | 149 | 3   | IM | Day 0 + 56               |
| 8                                                          | NRVV              | Serum Institute of India                                   | Covishield (Oxford/ AstraZeneca formulation) | 49  | 3   | IM | Day 0 + 84               |
| 9                                                          | Inactivated Virus | Bharat Biotech                                             | Covaxin                                      | 14  | 3   | IM | Day 0 + 14               |
| 10                                                         | Inactivated Virus | Sinopharm (Beijing)                                        | Covilo                                       | 93  | 4   | IM | Day 0 + 21               |
| 11                                                         | Inactivated Virus | Sinovac                                                    | CoronaVac                                    | 56  | 4   | IM | Day 0 + 14               |

The table summarizes the various types of COVID-19 vaccines along with list of vaccines granted Emergency Use Listing (EUL) by WHO, developer, vaccine name, countries approved for use, phase, route of administration and number of doses with days [51,100]
